# Supplementary material for: Contactless measurement of the photovoltage in BiVO4 photoelectrodes
Source: Royal Society of Chemistry journal article supplement (doi:10.1039/d3ee02087h), 2023-01-01
Supplement: d3ee02087h1.pdf [file d3ee02087h1.pdf]

SUPPORTING INFORMATION – 6 pages

**Contactless Measurement of Photovoltage in BiVO<sub>4</sub> Photoelectrodes**

Sahar Daemi,<sup>a</sup> Anna Kundmann,<sup>a</sup> Kathleen Becker,<sup>a</sup> Peter Cendula,<sup>b</sup> Frank E. Osterloh,<sup>\*,a</sup>

<sup>a</sup> Department of Chemistry, University of California, Davis, CA 95616, USA  
(fosterloh@ucdavis.edu)

<sup>b</sup> Faculty of Electrical Engineering and Information Technology, University of Žilina, Liptovsky  
Mikulas, 03104, Slovakia

**Table S1.** Semiconductor and junction information.

| Semiconductors                                 | n-BiVO <sub>4</sub> |  |  |  |
|------------------------------------------------|---------------------|--|--|--|
| Band Gap / eV                                  | 2.4                 |  |  |  |
| Dielectric Constant                            | 68.0 <sup>a</sup>   |  |  |  |
| Thickness / $\mu\text{m}$                      | 1.4                 |  |  |  |
| Conduction Band edge / V vs RHE                | 0.041               |  |  |  |
| Valence band edge / V vs RHE                   | 2.44                |  |  |  |
| E <sub>F</sub> (Flatband potential) / V vs RHE | 0.10 <sup>b</sup>   |  |  |  |

  

| Redox Couples                            | I <sub>3</sub> /I <sup>-</sup>               | SO <sub>4</sub> <sup>2-</sup> /SO <sub>3</sub> <sup>2-</sup> | O <sub>2</sub> /H <sub>2</sub> O <sub>2</sub> | HCF <sup>3-/4-</sup> |
|------------------------------------------|----------------------------------------------|--------------------------------------------------------------|-----------------------------------------------|----------------------|
| E <sup>0</sup> / V vs NHE                | 0.54                                         | 0.17                                                         | 0.70                                          | 0.36                 |
| E <sup>0</sup> / V vs RHE (calculated)   | 0.85 at pH 6.7<br>(KI <sub>3</sub> :KI 5:95) | 0.17 at pH 9.6                                               | 0.70 at pH 4.2                                | 0.70 at pH 5.6       |
| E <sub>F</sub> / V vs RHE (experimental) | 0.89                                         | 0.17                                                         | 0.80                                          | 0.70                 |
| Built-in potential (band bending) / V    | 0.79                                         | 0.07                                                         | 0.70                                          | 0.60                 |
| Depletion layer width / nm <sup>c</sup>  | 11                                           | 3                                                            | 10                                            | 9                    |

<sup>a</sup> from Wang et al. <sup>1</sup>

<sup>b</sup> from Kim et al. <sup>2</sup>

<sup>c</sup> calculated from Poisson equation.

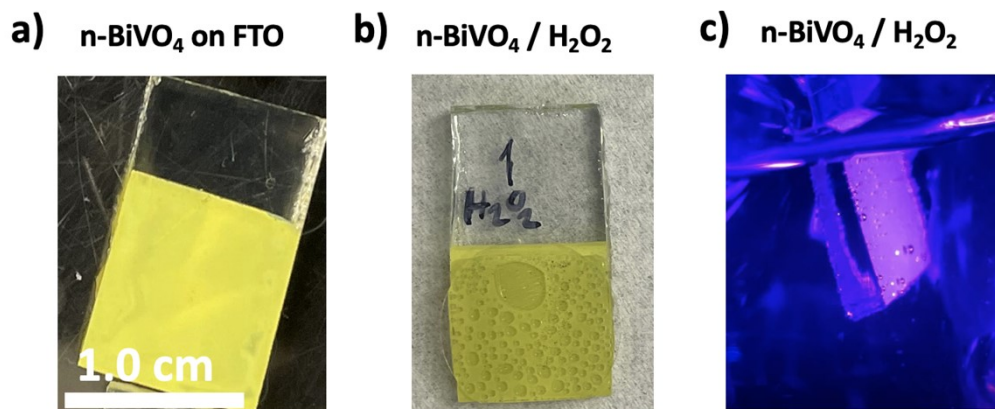

**Figure S2.** Photos of semiconductor electrodes. a) BiVO<sub>4</sub> on FTO. b) BiVO<sub>4</sub>/H<sub>2</sub>O<sub>2</sub> after SPV experiment, c) BiVO<sub>4</sub> electrode during short circuit current experiment in aqueous H<sub>2</sub>O<sub>2</sub>.

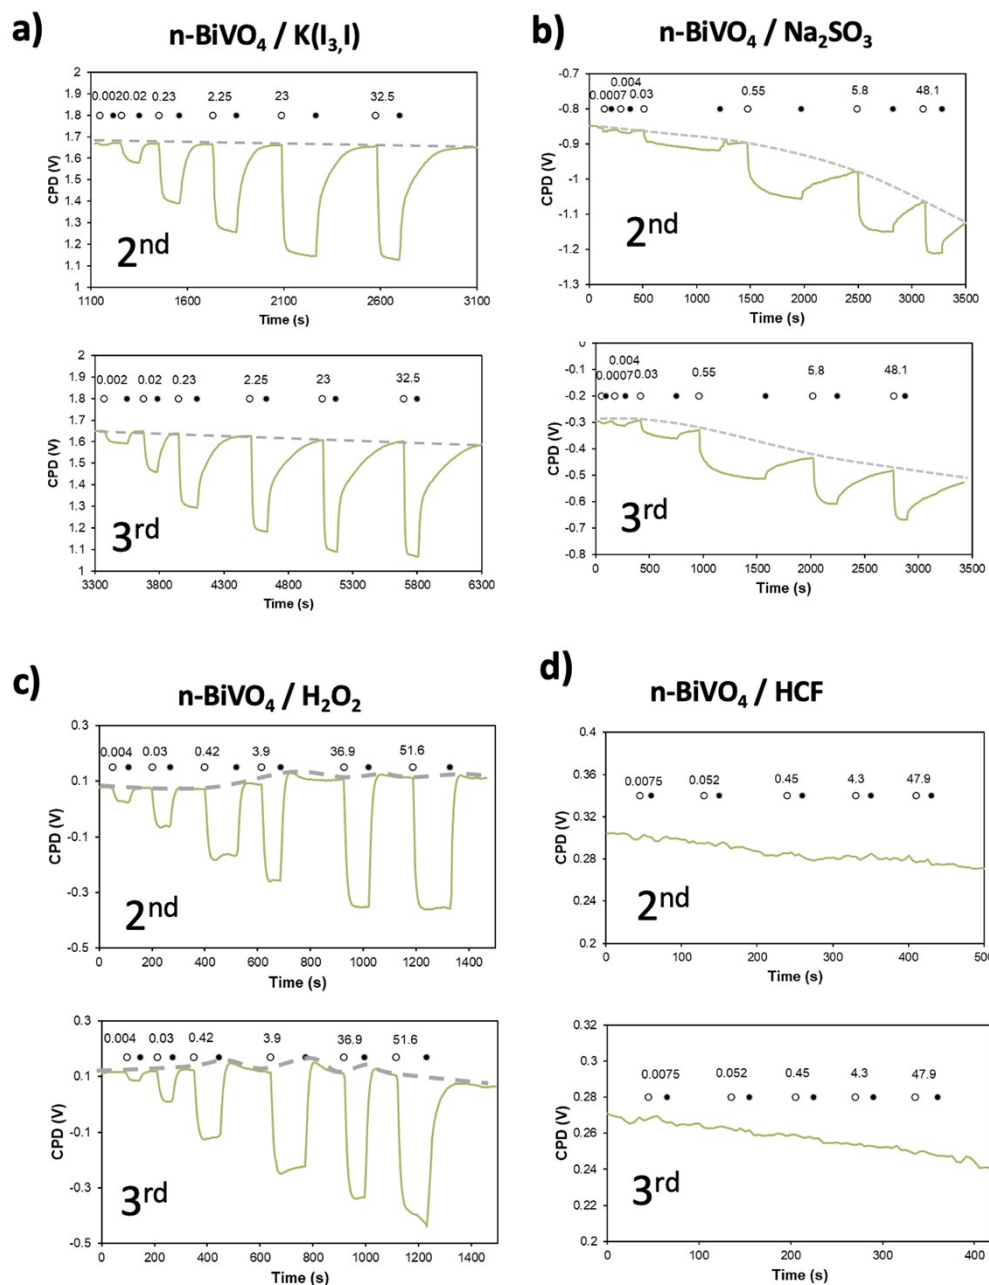

**Figure S3.** Additional surface photovoltage data under monochromatic illumination of variable irradiance. BiVO<sub>4</sub> film on FTO in contact with aqueous solutions of a) KI/KI<sub>3</sub> (470 nm) b) Na<sub>2</sub>SO<sub>3</sub> (400 nm), c) H<sub>2</sub>O<sub>2</sub> (400 nm), or d) K<sub>3/4</sub>[Fe(CN)<sub>6</sub>] (HCF) (400 nm). Empty circles are light and filled circles are dark periods.

**Table S4.** SPV statistics. Data from **Figures 3** and **S2**.

| <b>BiVO<sub>4</sub>/ K(I<sub>3</sub>,I)</b>        |                     |            |            | <b>BiVO<sub>4</sub>/ Na<sub>2</sub>SO<sub>3</sub></b> |          |            |         |
|----------------------------------------------------|---------------------|------------|------------|-------------------------------------------------------|----------|------------|---------|
| Intensity / mW cm <sup>-2</sup>                    | average<br>ΔCPD / V | STD /<br>V | STD /<br>% | Intensity / mW cm <sup>-2</sup>                       | ΔCPD / V | STD /<br>V | STD / % |
| 0.002                                              | -0.03               | 0.02       | 66         | 0.0007                                                | -0.012   | 0.006      | 50      |
| 0.02                                               | -0.15               | 0.06       | 37         | 0.004                                                 | -0.03    | 0.02       | 67      |
| 0.23                                               | -0.31               | 0.03       | 9          | 0.03                                                  | -0.075   | 0.01       | 13      |
| 2.25                                               | -0.42               | 0.02       | 4          | 0.55                                                  | -0.158   | 0.02       | 13      |
| 23.0                                               | -0.50               | 0.01       | 2          | 5.8                                                   | -0.167   | 0.006      | 4       |
| 32.5                                               | -0.52               | 0.01       | 2          | 48.1                                                  | -0.17    | 0.01       | 6       |
| <b>BiVO<sub>4</sub>/H<sub>2</sub>O<sub>2</sub></b> |                     |            |            | <b>BiVO<sub>4</sub>/ HCF</b>                          |          |            |         |
| Intensity / mW cm <sup>-2</sup>                    | average<br>ΔCPD / V | STD /<br>V | STD /<br>% | Intensity / mW cm <sup>-2</sup>                       | ΔCPD / V | STD /<br>V | STD / % |
| 0.004                                              | -0.035              | 0.01       | 28         | 0.0007                                                | 0        | -          | -       |
| 0.03                                               | -0.11               | 0.02       | 18         | 0.004                                                 | 0        | -          | -       |
| 0.42                                               | -0.24               | 0.01       | 4          | 0.03                                                  | 0        | -          | -       |
| 3.9                                                | -0.36               | 0.02       | 5          | 0.55                                                  | 0        | -          | -       |
| 36.9                                               | -0.46               | 0.02       | 4          | 5.8                                                   | 0        | -          | -       |
| 51.6                                               | -0.49               | 0.01       | 2          | 48.1                                                  | 0        | -          | -       |

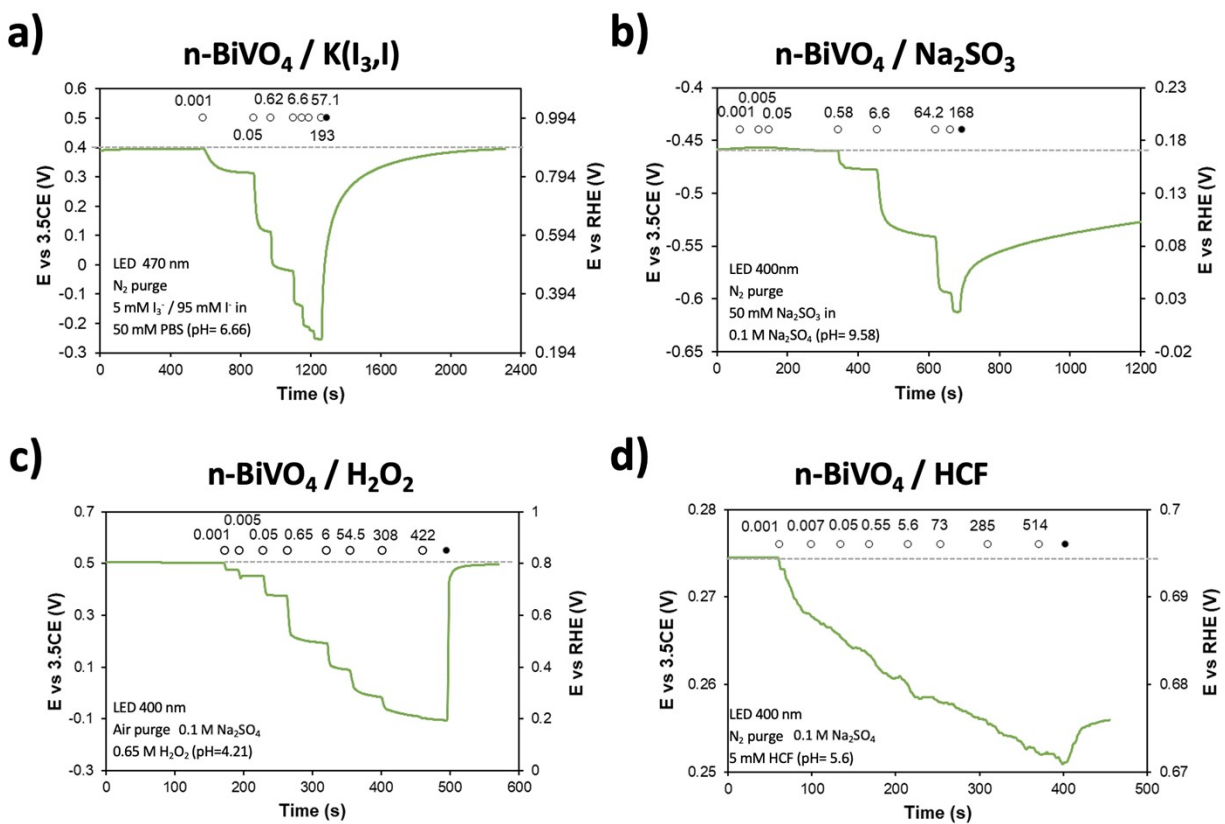

**Figure S5.** FTO/BiVO<sub>4</sub> Fermi levels from OCP measurements versus calomel electrode in the dark and under monochromatic illumination (irradiances given in mW cm<sup>-2</sup>). For the K(I<sub>3</sub>,I) electrolyte a 470 nm LED was used, while all other systems used a 400 nm LED. All electrolytes (except for c) were de-aerated with N<sub>2</sub> gas, except for c. Data in b) was obtained after exposing the BiVO<sub>4</sub> photoelectrode to a light-dark cycle (168 mW cm<sup>-2</sup> of 400 nm) to establish a stable Fermi level in the dark.

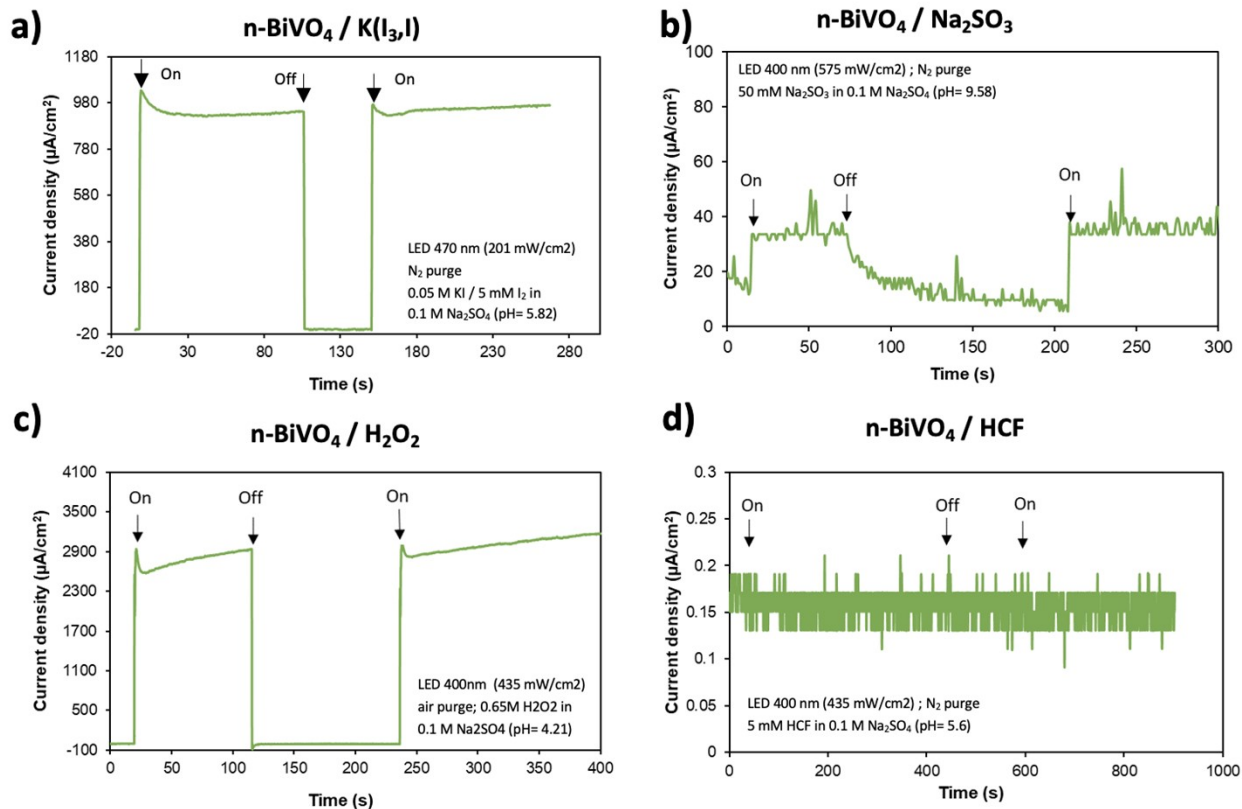

**Figure S6.** Short circuit photocurrent against Pt counter electrode in aqueous electrolyte. a) n-BiVO<sub>4</sub>/K(I<sub>3</sub>,I) under LED light (470 nm, 201 mW cm<sup>-2</sup>), b) BiVO<sub>4</sub>/ Na<sub>2</sub>SO<sub>3</sub> under LED light (400 nm, 575 mW cm<sup>-2</sup>), c) BiVO<sub>4</sub>/ H<sub>2</sub>O<sub>2</sub> under LED light (400 nm, 435 mW cm<sup>-2</sup>), d) BiVO<sub>4</sub>/ HCF under LED light (400 nm, 435 mW cm<sup>-2</sup>). The weak 10 µA cm<sup>-2</sup> current is attributed to reduction of O<sub>2</sub> traces at the counter electrode. Electrolytes were de-aerated with bubbling N<sub>2</sub> gas, except for c), which was recorded in the presence of air.

## References

1. Wang, Q. *et al.* Particulate Photocatalyst Sheets Based on Carbon Conductor Layer for Efficient Z-Scheme Pure-Water Splitting at Ambient Pressure. *Journal of the American Chemical Society* **139**, 1675-1683, (2017).
2. Kim, T. W. & Choi, K.-S. Nanoporous BiVO<sub>4</sub> Photoanodes with Dual-Layer Oxygen Evolution Catalysts for Solar Water Splitting. *Science* **343**, 990-994, (2014).
